# Supplementary material for: Gene Expression Profiles Deciphering the Pathways of Coronatine Alleviating Water Stress in Rice (Oryza sativa L.) Cultivar Nipponbare (Japonica)
Source: PubMed Central journal article supplement (PMC6567010; doi:10.3390/ijms20102543), 2019-05-23
Supplement: ijms-20-02543-s001.pdf [file ijms-20-02543-s001.pdf]

**Table S1.** Gene-specific primers for RT-qPCR analysis.

| Gene Name    |         | Primer                           | Product Size (bp) |
|--------------|---------|----------------------------------|-------------------|
| Os01g0298400 | Forward | 5' -CACGAGCGTTGGGATCAGT-3'       | 147               |
|              | Reverse | 5' -AAATTACTCCACCAGCAGTTGTCTC-3' |                   |
| Os01g0597800 | Forward | 5' -ATGATCGACCCAAAGAAACG-3'      | 92                |
|              | Reverse | 5' -CTGTTGAACACCTCGCCATA-3'      |                   |
| Os01g0826400 | Forward | 5' -GACATGTCGGAGCATTCTT-3'       | 99                |
|              | Reverse | 5' -GGAGCCAACTCTGATCTCGT-3'      |                   |
| Os02g0278400 | Forward | 5' -GATCAGCACCGCAAATA-3'         | 131               |
|              | Reverse | 5' -AAACCCTAGCCGTCACCT-3'        |                   |
| Os02g0426800 | Forward | 5' -TTCTTCGTCCTCGTCTTCGT-3'      | 104               |
|              | Reverse | 5' -CTCCTGTGCTTCTTGACCTC-3'      |                   |
| Os02g0572200 | Forward | 5' -ATCCACGCGGGTACTACAAG-3'      | 179               |
|              | Reverse | 5' -GTCGTAGGTGACGATGAGCA-3'      |                   |
| Os04g0447700 | Forward | 5' -GCAGAACTGGATAGGCGAAG-3'      | 144               |
|              | Reverse | 5' -TTGTAGCTCTTGGGGATTGG-3'      |                   |
| Os04g0578000 | Forward | 5' -GTTGCTGGAGGTCAGGAATAAAG-3'   | 148               |
|              | Reverse | 5' -GACGGGTTGGTGATGAGGA-3'       |                   |
| Os08g0520500 | Forward | 5' -TTTCATGTAGCTGGTGGAC-3'       | 179               |
|              | Reverse | 5' -TCGTAGGACCCAACACAACA-3'      |                   |
| Os09g0479800 | Forward | 5' -CAACTCCAGCGAGTGCATTA-3'      | 128               |
|              | Reverse | 5' -TTGATTTCTTGGCTGCTGTG-3'      |                   |
| actin        | Forward | 5' -TTATGGTTGGGATGGGACA-3'       | 292               |
|              | Reverse | 5' -AGCACGGCTTGAATAGCG-3'        |                   |
